# Supplementary material
Source: publisher figshare collection journal article supplement (https://geolsoc.figshare.com/ndownloader/files/28832362)
Supplement: Supplementary file 1 [file 28832362]

## Sheet: Supplementary Materials 1
Supplementary material 1. Microthermometric results of type-2 and -5 fluid inclusion assembladges and isolated inclusions from the Patterson Lake corridor.
Occurrence	Sz (µ)	V (%)	Tf (°C)	Tfm (°C)	Tm-ice (°C)	Tm-HH (°C)	Thv (°C)	Tm-H (°C)	Sal. (wt%)	XNaCl
MR-17-PP-07 (DDH HK-16-35, 327.4 m, Q3, Basement)
Chip1
Intra-HF1 (intracrystal healed fracture)	7	14	-41.3	–	-0.9	–	84	–	1.3803	0.998602
	11	10	–	–	–	–	84	–	–	–
	5	12	–	–	–	–	82	–	–	–
	8	12.5	–	–	–	–	84	–	–	–
	16	16	–	–	–	–	118	–	–	–
IS1 (isolated)	19	11	–	–	–	–	125	–	–	–
IS2 (isolated)	5	20	–	–	–	–	117	–	–	–
IS3 (isolated)	9	10	–	–	–	–	115	187	31.07	0.99
IS4 (isolated)	10	10	–	–	–	–	95	–	–	–
IS5 (isolated)	4.5	16	–	–	–	–	98.5	–	–	–
IS6 (isolated)	7	12	–	–	–	–	117	–	–	–
IS7 (isolated)	5.5	16	–	–	–	–	140	–	–	–
IS8 (isolated)	5	14	–	–	–	–	104	–	–	–
MR-17-PP-08 (DDH HK-16-35, 328.3 m, Q3, Basement)
Chip1
IS2 (isolated)	18	20	–	–	–	–	–	174	30.6285	0.991927
IS3 (isolated)	18	16	–	–	–	–	147.3	187	31.0776	0.992112
IS4 (isolated)	13	12	–	–	–	–	98	213	32.1109	0.992482
IS5 (isolated)	8	–	–	–	–	–	–	271	35.2097	0.993449
MR-17-PP-23 (DDH HK-16-53, 240.4 m, Q3, Basement)
Chip1
IS1 (isolated)	9	20	–	–	–	–	214	–	–	–
Intra-HF1 (intracrystal healed fracture)	24	14	-42.9	–	-2.7	–	145	–	4.5795	0.998602
	11	14	-42.9	–	-2.7	–	144	–	4.5795	0.998602
	7	14	-42.9	–	-2.7	–	146	–	4.5795	0.998602
	8	14	-42.9	–	-2.7	–	144	–	4.5795	0.998602
	9	14	-38.7	–	-0.8	–	154	–	1.1888	0.998602
	10	14	-42.9	–	-2.7	–	140	–	4.5795	0.998602
	13	14	-39.5	–	-0.8	–	166	–	1.1888	0.998602
Chip2
Intra-HF1 (intracrystal healed fracture)	12	16	-41.3	–	-0.9	–	157	–	1.3803	0.998602
	6	16	-41.3	–	-0.8	–	152	–	1.1888	0.998602
	8	16	-41.3	–	-0.9	–	158	–	1.3803	0.998602
	7	16	-41.3	–	–	–	134	–	–	–
	6	16	-41.3	–	-0.9	–	155	–	1.3803	0.998602
IS1 (isolated)	5	20	-41.3	–	-1.3	–	181	–	2.1311	0.998602
IS2 (isolated)	9	16	-41.3	–	-1.4	–	199	–	2.3151	0.998602
Intra-HF2 (intracrystal healed fracture)	16	16	-39.3	–	-0.8	–	149	–	1.1888	0.998602
	11	12	-39.3	–	-0.3	–	149	–	0.2078	0.998602
	10	14	-39.5	–	-1	–	149	–	1.5702	0.998602
	7	12	-39.1	–	0	–	157	–	–	–
	9	11	-39.1	–	0	–	135	–	–	–
	11	14	-40.9	–	-1.8	–	180	–	3.0367	0.998602
	5	20	-40.5	–	-1.5	–	202	–	2.4977	0.998602
	6.5	25	-40.2	–	-0.5	–	191	–	0.605	0.998602
MR-17-PLS-44 (DDH PLS-16-467, 140.3 m, Q3, Basement, 2 km SE of PLc
Chip1
Intra-HF1 (intracrystal healed fracture)	4	20	>-51	–	-10.5	–	157	–	14.4915	0.998602
	4	30	>-52	–	-11	–	145	–	14.9791	0.998602
	5.3	20	>-54	–	-11	–	145	–	14.9791	0.998602
	6	25	>-53	–	-11	–	200	–	14.9791	0.998602
	5.3	30	>-50	–	–	–	240	–	–	–
MR-17-PLS-45 (DDH PLS-16-467, 167 m, Q3, Basement, 2 km SE of Plc
Chip1
Intra-HF1 (intracrystal healed fracture)	19	11	-60	–	-14.3	–	185	–	17.9396	0.998602
	8	12	-60	–	-14.3	–	170	–	17.9396	0.998602
Chip2
Intra-HF1 (intracrystal healed fracture)	11	16.5	-39	–	–	–	244	–	–	–
	13	16.5	-57.3	–	-8.5	–	228	–	12.4058	0.998602
MR-17-PP-19 (DDH HK-16-53, 234.1 m, Q4, Basement)
Chip1
Intra-HF1 (intracrystal healed fracture)	24	12	-39	–	-0.5	–	165	–	0.605	0.998602
	13	12	-37.2	–	-0.5	–	166	–	0.605	0.998602
	10	16	-37.2	–	-0.5	–	186	–	0.605	0.998602
	13.5	14	-39	–	-0.5	–	164	–	0.605	0.998602
Intra-HF2 (intracrystal healed fracture)	22	14	-52	–	-12.5	–	161	–	16.3745	0.998602
	7	25	-70	–	-18	–	183	–	20.904	0.998602
	7.5	20	-29	–	-0.5	–	189	–	0.605	0.998602
	16	20	-38	–	0	–	228	–	-0.4	0.998602
	8.5	14	-37.5	–	-28	–	>230	–	25.6178	0.546244
MR-17-PP-29 (DDH HK-16-53, 308.7 m, Q4, Basement)
Chip1
IS1 (isolated)	7	11	-51	–	-11	–	146	–	14.9791	0.998602
Intra-HF1 (intracrystal healed fracture)	6	12	-50	–	-12.1	–	158	–	16.0115	0.998602
	6	12	-50	–	-10.2	–	173	–	14.193	0.998602
	10	12	-52.1	–	-10.1	–	172	–	14.0925	0.998602
IS2 (isolated)	10	11	-51.8	–	-10.5	–	154	–	14.4915	0.998602
MR-17-PLS-41 (DDH PLS-17-550, 279.4 m, Q4-7, Basement)
Chip1
IS1 (isolated)	14	11	-50	–	-26.7	-0.1	88	–	27.1684	0.677248
IS2 (isolated)	18	25	-41.5	–	-2.5	–	>220	–	4.246	0.998602
IS3 (isolated)	8	16	-40	–	-0.7	–	167	–	0.9957	0.998602
IS4 (isolated)	9	20	-42.9	–	-2.8	–	208	–	4.7444	0.998602
Chip2
Intra-HF1 (intracrystal healed fracture)	5	14	-47.4	–	-5.3	–	80	–	8.4855	0.998602
	15	9	-47.4	–	-3	–	86	–	5.0703	0.998602
	4	14	-46.4	–	-5.3	–	88	–	8.4855	0.998602
	4	16	-46.1	–	-7	–	115	–	10.6709	0.998602
	9	10	-44	–	-7	–	104	–	10.6709	0.998602
Intra-HF2 (intracrystal healed fracture)	6	14	-80	–	-24.4	–	136	–	24.4604	0.762722
	6	14	–	–	–	–	136	–	–	–
Intra-HF3 (intracrystal healed fracture)	9.2	14	-79	–	-25	–	130	–	24.6598	0.722323
	6	14	-79	–	–	–	130	–	–	–
IS1 (isolated)	6	14	-55.2	–	-16	–	92	–	19.335	0.998602
GZ1 (growth zone)	21.3	10	-43	–	-10.9	–	132	–	14.8825	0.998602
	9.5	11	-42.7	–	-12.5	–	103	–	16.3745	0.998602
	26.5	12	-45.9	–	-16.7	–	96	–	19.8917	0.998602
	10	14	-46	–	-13.2	–	192	–	16.9957	0.998602
	8	16	-58	–	-10.6	–	167	–	14.59	0.998602
MR-17-PP-43B (DDH HK-17-73, 141.3 m, Q5, Basin)
Chip3
IS1 (isolated)	4	25	–	–	–	–	161	–	–	–
MR-17-PP-02 (DDH HK-16-35, 137.4 m, Q5, Basin)
Chip1
IS1 (isolated)	10	10	–	–	–	–	121	–	–	–
Chip2
IS1 (isolated)	7	9	–	–	–	–	129	–	–	–
IS2 (isolated)	8	11	–	–	–	–	90	175	30.6616	0.991953
IS3 (isolated)	7	14	–	–	–	–	>200	–	–	–
MR-17-PP-56 (DDH HK-17-70, 195.2 m, Q5, Basin)
Chip1
IS1 (isolated)	11	25	–	–	–	–	240	–	–	–
MR-17-PP-03 (DDH HK-16-35, 108.1 m, Q5, Basin)
Chip1
IS1 (isolated)	9	8	–	–	–	–	76	–	–	–
IS2 (isolated)	8	20	–	–	–	–	170	–	–	–
IS3 (isolated)	10	14	–	–	–	–	196	–	–	–
Chip2
IS1 (isolated)	8	14	–	–	–	–	215	–	–	–
IS2 (isolated)	6	14	-62	–	-12.1	-1.8	129	–	16.0126	1
IS3 (isolated)	5.5	25	–	–	–	–	200	–	–	–
MR-17-PP-43 (DDH HK-17-73, 141.3 m, Q6a, Basin)
Chip1
GZ1 (growth zone)	80	14	-56.5	<-52	-21.3	–	236.8	–	23.3544	0.990942
	38	14	–	–	–	–	156.2	–	–	–
GZ2 (growth zone)	20	14	–	–	–	–	>250	–	–	–
	15	14	–	–	–	–	>250	–	–	–
	35	14	–	–	–	–	>250	–	–	–
MR-17-PP-44 (DDH HK-17-73A, 139.6 m, Q6a, Basin)
Chip1
Intra-HF1 (intracrystal healed fracture)	5.4	16	-71	<-55	-25	–	119	–	24.6598	0.722323
	6	15	-73.3	<-59	-30.1	–	118	–	26.2581	0.448468
	7.5	12	-71.7	<-59	-30	–	119	–	26.2281	0.452686
Intra-HF2 (intracrystal healed fracture)	28	12	–	–	–	–	118	–	–	–
	33	9	–	–	–	–	115	–	–	–
	15	12	–	–	–	–	115	–	–	–
	16	12	–	–	–	–	115	–	–	–
MR-17-PP-45 (DDH HK-17-73A, 139.8 m, Q6a, Basin)
Chip1
IS1 (isolated)	90	3	-46.4	<-50	-9.3	–	91	–	13.2682	0.998602
IS2 (isolated)	31	4	–	–	–	–	111	–	–	–
IS3 (isolated)	60	7	–	–	–	–	128	–	–	–
Intra-HF1 (intracrystal healed fracture)	70	15	-69	<-60	-18.4	–	>250	–	21.2108	0.998602
	30	15	-62.7	<-60	-16.9	–	>250	–	20.0491	0.998602
GZ1 (growth zone)	50	10	-47.6	<-50	-6.6	–	187	–	10.1792	0.998602
	35	9	–	–	–	–	124	–	–	–
GZ2 (growth zone)	9	10	-81	<-66	-25.1	-4.7	133	–	26.7845	0.760666
	9	9	-89	<-60	-25.1	-4.7	124	–	26.7845	0.760666
	9	13	-77	<-60	-25.1	-4.7	136	–	26.7845	0.760666
Intra-HF2 (intracrystal healed fracture)	90	20	–	–	–	–	>260	161	30.2179	0.991768
	40	30	–	–	–	–	>260	236	33.1979	0.992826
Intra-HF3 (intracrystal healed fracture)	20	9	-79.2	<-50	-25	-8.1	158	–	26.5037	0.761353
	20	10	-81	<-60	-25.2	-8.2	145	–	26.5493	0.749991
Intra-HF4 (intracrystal healed fracture)	16	12	-78	-56	-31.8	–	249	–	26.759	0.382841
MR-17-PP-53 (DDH HK-17-70, 244.1 m, Q6a, Basin)
Chip1
Intra-HF1 (intracrystal healed fracture)	17	10	-65	<-50	-13.4	–	213	–	17.1701	0.998602
	43	11	-61	<-50	-13.4	–	183	–	17.1701	0.998602
IS1 (isolated)	34	6	-59	<-50	-16.3	–	125	–	19.5747	0.998602
MR-17-PP-18 (DDH HK-16-53, 223.5 m, Q6b, Basement)
Chip1
Intra-HF1 (intracrystal healed fracture)	5	12	–	<-46	-25.5	-4.5	120	–	26.8983	0.739246
	22	11	-81	-49	-25.5	-2.6	120	–	26.95	0.740342
	11	12	-84	-49	-26	-4.5	144	–	27.0236	0.713062
	7	12	-72	-49	-26	-4.5	115	–	27.0236	0.713062
	4	16	–	–	-26	–	110	–	24.9856	0.65872
IS1 (isolated)	55	12	-49	-56	-17.3	–	186	153.7	20.3621	0.998602
IS2 (isolated)	19	7	-49	<-55	-17.4	–	82.8	151	20.4399	0.998602
Intra-HF2 (intracrystal healed fracture)	10	14	–	–	–	–	113.2	–	–	–
	8	14	–	–	–	–	115.5	–	–	–
	10	9	–	<-56	-32.5	–	118	–	26.9606	0.35895
	10	10	–	<-57	-42	–	108.5	–	29.4006	0.166705
	9	11	–	–	–	–	115.5	–	–	–
MR-17-PP-27 (DDH HK-16-53, 251.9 m, Q6b, Basement)
Chip1
Intra-HF1 (intracrystal healed fracture)	20	9	-94.1	-58	-26.6	–	146	–	25.1777	0.622906
	6	9	–	–	–	–	126	–	–	–
	6	9	–	-52	-25	–	134	–	24.6598	0.722323
	8	10	–	-52	-26.5	–	137	–	25.1459	0.628751
	8	9	–	-53	-24	–	106	–	24.3255	0.790514
GZ1 (growth zone)	16	9	-95	-53	-28.2	–	163	–	25.6798	0.536067
	16	10	–	–	–	–	134	–	–	–
	16	10	–	-51	-29	–	167	–	25.9256	0.497222
GZ2 (growth zone)	20	11	–	-50	-29.4	–	242	–	26.0472	0.478886
	12	12	–	–	–	–	176	–	–	–
GZ3 (growth zone)	20	12	–	–	–	–	129	–	–	–
	20	7	–	–	–	–	130	–	–	–
	20	7	–	–	–	–	112	–	–	–
	16	11	–	–	–	–	138	–	–	–
	8	12	–	–	–	–	130	–	–	–
	10	10	–	–	–	–	113	–	–	–
Chip2
GZ1 (growth zone)	24	6	–	<-55	-38.1	–	107	–	28.4695	0.221085
	6	8	–	–	–	–	120	–	–	–
	10	7	–	–	–	–	83	–	–	–
Intra-HF1 (intracrystal healed fracture)	36	11	-81.1	<-53	-28	-5.3	157	–	27.4038	0.614258
	16	11	-86	<-50	-26.9	–	160	–	25.273	0.605667
MR-17-PP-29 (DDH HK-16-53, 308.7 m, Q6b, Basement)
Chip1
GZ1 (growth zone)	10	7	-79	-57	-34	-10	101	–	28.5722	0.392588
	13	12	–	–	–	–	232	–	–	–
	9	15	–	–	–	–	>250	–	–	–
IS3 (isolated)	30	9	-83	<-49	-27	-0.7	128	–	27.2191	0.662113
IS4 (isolated)	13	8	–	<-47	–	–	114	–	–	–
IS5 (isolated)	10	11	-64.8	<-55	-26.1	–	136	–	25.0178	0.652628
GZ2 (growth zone)	17	8	-80	<-60	-33.3	–	159	–	27.1877	0.333698
	12	8	–	<-59	-33.4	–	127	–	27.2158	0.330689
	30	7	-85.3	-65.5	-27	-0.4	155	–	27.2191	0.662113
	9	9	-87	<-69	-35.4	–	83	–	27.7658	0.276876
MR-17-PP-42 (DDH HK-17-72, 445.5 m, Q6b, Basement)
Chip1
IS1 (isolated)	25	16	–	<-55	-47	–	178	–	30.448	0.126169
IS2 (isolated)	16	11	–	<-55	-44	–	140	–	29.8377	0.147523
IS3 (isolated)	23.6	9	–	<-55	-28	-0.5	94	–	27.4038	0.614258
Intra-HF1 (intracrystal healed fracture)	26	9	–	<-55	-43.3	–	120	–	29.6878	0.153704
	29	7	-83	<-55	-30.4	16	120	–	27.8616	0.512847
IS4 (isolated)	10	12	–	<-55	-43.5	–	106	–	29.7309	0.151884
IS5 (isolated)	18	14	–	<-55	-43.5	–	123	–	29.7309	0.151884
IS6 (isolated)	29	14	–	>-50	-6.8	–	206	–	10.4267	0.998602
Chip2
Intra-HF1 (intracrystal healed fracture)	6	14	–	–	–	–	131	–	–	–
	11	14	–	–	–	–	106	–	–	–
	10	14	–	–	–	–	126.5	–	–	–
	22	13	–	–	–	–	105	–	–	–
Intra-HF2 (intracrystal healed fracture)	13	9	-90	<-50	-29.5	1.2	126	–	27.687	0.548683
	11	10	-90	<-50	-29.5	–	127.5	–	26.0775	0.474412
	7	14	-90	<-50	-29.5	–	126	–	26.0775	0.474412
	15	10	-80	<-50	-28.4	-0.3	126	–	27.4808	0.596126
Crystal2
Intra-HF1 (intracrystal healed fracture)	10	16	–	–	–	–	202	–	–	–
	8	16	–	–	–	–	185	–	–	–
	10	16	–	–	-26.5	–	191	–	25.1459	0.628751
	6	16	–	<-50	–	-2.6	212	–	–	–
	6	16	–	–	–	–	238	–	–	–
IS1 (isolated)	9	15	–	<-53	-24.2	-7.4	129.5	–	26.3456	0.808592
IS2 (isolated)	10	15	–	<-53	-24.2	–	131.5	–	24.3932	0.776536
Chip3
Intra-HF1 (intracrystal healed fracture)	8	12	-90	<-60	-34.3	–	129	–	27.4663	0.305012
	5	14	-90	< -60	-34.3	–	141	–	27.4663	0.305012
Crystal3
Intra-HF1 (intracrystal healed fracture)	45	5	-74	–	-27.2	–	130	–	25.3677	0.588875
	50	7	-77	–	-12.9	–	124.4	–	16.7316	0.998602
	32	7	-55	–	-16.5	–	117	–	19.7336	0.998602
	40	7	-55	–	-17.3	–	115.5	–	20.3621	0.998602
MR-17-PP-59 (DDH HK-15-27, 295.1 m, Q6b, Basement)
Chip1
Intra-HF1 (intracrystal healed fracture)	35	9	–	<-57	<-53	–	120	–	–	–
	20	10	-54	<-50	-25.3	-9.2	128	–	26.4928	0.742709
	28	10	-78.6	<-51	-23.8	-12.6	120	–	25.7157	0.825738
	41	10	-64.7	<-51	-23.8	-12	121.5	–	25.7818	0.826623
Chip2
Intra-HF1 (intracrystal healed fracture)	11	12	-77	<-55	-23.2	–	124	–	24.0501	0.847922
	18	10	-78	<-55	-23	-12	120	–	25.5205	0.877647
	17	8	-76	<-55	-23	–	115	–	23.9799	0.862606
	26	9	-76	<-55	-24.1	-9.2	116	–	26.1567	0.812198
	50	9	-75	<-55	-23	-13.5	115	–	25.3385	0.875984
Intra-HF2 (intracrystal healed fracture)	29	7	-72	<-51	-23	-16.7	116	–	24.9175	0.872023
	13	9	-74	<-51	-23	-16.7	129	–	24.9175	0.872023
	45	5	-74	<-51	-23	-12.5	122	–	25.461	0.877104
	7	14	-74	<-51	-23.4	–	118	–	24.1197	0.833362
	10	11	–	<-51	-24.1	-9	121	–	26.1754	0.81247
MR-17-PP-61 (DDH HK-15-27, 440 m, Q6b, Basement)
Chip1
Intra-HF1 (intracrystal healed fracture)	20	10	–	–	–	–	123	–	–	–
	15	10	–	–	–	–	125	–	–	–
	13.6	11	–	–	–	–	126	–	–	–
	12	12	–	–	–	–	128	–	–	–
Intra-HF2 (intracrystal healed fracture)	17.6	8	–	–	–	–	93	107	28.8106	0.991213
	35	6	–	–	–	–	94.5	107	28.8106	0.991213
	100	5.5	–	–	–	–	108	105	28.7644	0.991186
Chip2
Intra-HF1 (intracrystal healed fracture)	17.5	10	–	–	–	–	130	–	–	–
	20	9	–	–	–	–	124	–	–	–
	12	9	–	–	–	–	126	–	–	–
MR-18-AR-04 (DDH AR-15-57-C5, 825.9 m, Q6b, Basement)
Chip1
Intra-HF1 (intracrystal healed fracture)	10.3	10	–	<-55	-24.7	-3.5	108	–	26.7619	0.784307
	9.3	12	–	<-55	-24.7	-3.2	109	–	26.7804	0.784619
	9	12	–	<-55	-24.8	–	118	–	24.5937	0.73561
	12	9	–	<-55	-25	-5	102	–	26.7389	0.765803
	7.4	12	–	<-55	-25	–	118	–	24.6598	0.722323
	12	10	–	<-55	-25	–	108	–	24.6598	0.722323
Chip2
GZ1 (growth zone)	8	12	-80	<-54	-24.5	–	137	–	24.4939	0.755878
	20	7	-83	<-54	–	–	127	–	–	–
	5	9	-90	<-54	-24.7	–	113	–	24.5605	0.742322
	16	11	-70	<-54	–	–	159	–	–	–
	11	7	-77	<-54	-24.7	-0.6	105	–	26.7983	0.784923
	7	10	-85	<-54	-24.6	–	186	–	24.5273	0.749078
MR-18-AR-05 (DDH AR-15-57-C5, 817.1 m, Q6b, Basement)
Chip1
Intra-HF1 (intracrystal healed fracture)	16	9	–	<-60	-48	–	92	–	30.6424	0.120498
	19	7	–	<-60	-46	–	97	–	30.2498	0.132483
	19	3.5	–	<-60	-48	–	71	–	30.6424	0.120498
	11	8	–	<-60	-47	–	83	–	30.448	0.126169
	11	6	–	–	–	–	82	–	–	–
	12	4.5	–	<-60	-46	17	82	–	30.8055	0.18555
	8	10	–	–	–	–	83	–	–	–
	12	8	–	–	–	–	82	–	–	–
	6	8	–	–	–	–	79	–	–	–
Intra-HF2 (intracrystal healed fracture)	20	6	-76	<-55	-23.3	–	91	–	24.085	0.840626
	24	7	-76	<-55	-23.3	–	86	–	24.085	0.840626
	11	8	-79	<-55	-23.8	–	84	–	24.2574	0.804649
	14	5	-76	<-55	-21.5	–	78	–	23.4311	0.975637
	23	6	-76	<-55	-19.5	-15.2	86	–	22.0508	1
	18	7	-76	<-55	-23.3	-18	84	–	24.859	0.849854
MR-18-AR-27 (DDH AR-16-78-C1, 532.5 m, Q6b, Basement)
Chip1
Intra-HF1 (intracrystal healed fracture)	100	8	-65	<-50	-22.6	-11.4	127	–	25.4562	0.90441
	66	8	-69	<-50	-22.6	-12.2	128	–	25.3589	0.903732
	44	9	-73	<-50	-22.6	-10.4	128	–	25.5732	0.905215
	47	10	-75	<-50	-22.6	-9.9	127	–	25.6296	0.905603
	29	14	-65	<-50	-22.6	-10	125	–	25.6185	0.905525
	26	10	-75	<-50	-22.6	-10.8	126	–	25.527	0.904898
	27	10	-75.5	<-50	-22.6	-13.5	126	–	25.194	0.902571
	46	7	-69	<-50	-22.4	-10.5	129	–	25.495	0.918269
	28	10	-67	<-50	-22.6	-10.8	125	–	25.527	0.904898
MR-18-AR-30 (DDH AR-16-78-C1, 498.5 m, Q6b, Basement)
Chip1
Intra-HF1 (intracrystal healed fracture)	14	11	–	–	–	–	112	246	33.7266	0.993012
	12	9	–	–	–	–	112	236	33.1979	0.992826
	8	9	–	–	–	–	100	190	31.1873	0.992138
	10	9	–	–	–	–	113	190	31.1873	0.992138
	8	9	–	–	–	–	110	179	30.7964	0.992006
	22	10	–	–	–	–	107	248	33.8367	0.993038
Chip2
Intra-HF1 (intracrystal healed fracture)	36	8	-75.5	<-55	–	–	90	–	–	–
	35	9	–	–	–	–	93	–	–	–
	37	7	–	<-55	-37	–	112	–	28.1884	0.241714
	30	8	–	–	–	–	106	–	–	–
Intra-HF2 (intracrystal healed fracture)	14	7	-71	<-50	-25.3	15	95	–	26.9107	0.751265
	9	8	-76	<-50	-25	13.5	102	–	26.8545	0.767953
	13	5	-77	<-50	-21.1	9.7	74	–	23.2479	1
	16	5	-71	<-50	-25.1	14	95	–	26.8732	0.762351
	5	9	-77	<-50	-22	>0	67	–	26.2687	0.948202
IS1	7	8	–	–	–	–	144	–	–	–
IS2	6	7	-79	<-50	-19.5	8.5	64	–	22.0508	1
MR-18-AR-32 (DDH AR-16-78-C1, 481.3 m, Q6b, Basement)
Chip1
Intra-HF1 (intracrystal healed fracture)	8	11	-84	<-60	-24.8	–	120	–	24.5937	0.73561
	9	11	-84	<-60	-24.8	–	123	–	24.5937	0.73561
	5	11	-84	<-60	-25	–	115	–	24.6598	0.722323
	10	10	-84	<-60	-25.6	–	132	–	24.8562	0.683583
	9	11	-84	<-60	-24.8	–	111	–	24.5937	0.73561
	28	9	-84	<-60	-27	-17	126	–	26.28	0.633432
MR-18-AR-37 (DDH AR-16-78-C1, 388.9 m, Q6b, Basement)
Chip1
GZ1 (growth zone)	16	14	-89	<-54	-23	-8	140	–	25.9517	0.881479
	9	14	-81	<-54	-23.5	-8.5	158	–	26.0499	0.849702
	9	14	-89	<-54	-23.5	-11.4	127	–	25.7521	0.846281
GZ2 (growth zone)	10	9	-85	<-54	-23.3	–	92	–	24.085	0.840626
	7	12	-77.9	<-54	-22.7	–	118	–	23.8734	0.884844
	7	12	-82.3	<-54	-22.8	–	129	–	23.909	0.877405
Chip2
GZ1 (growth zone)	6	14	-79.4	<-51	-24	–	102.5	–	24.3255	0.790514
	6	14	-76	<-51	-24	–	118	–	24.3255	0.790514
MR-18-AR-45 (DDH AR-16-78-C1, 140.3 m, Q6b, Basement)
Chip1
IS1 (isolated)	7	14	-76.5	<-60	-23	–	92	–	23.9799	0.862606
IS2 (isolated)	7	12	-75	<-60	-20.8	–	130	–	23.0185	0.998602
IS3 (isolated)	8	12	-72.5	<-60	-23.3	–	97	–	24.085	0.840626
IS4 (isolated)	8	12	–	–	–	–	99	–	–	–
IS5 (isolated)	8	12	–	–	–	–	99.1	–	–	–
Chip2
IS1 (isolated)	6	11	-44	–	-5.5	–	81	–	8.7561	0.998602
Chip3
IS1 (isolated)	46	9	-40	<-30	-9.4	–	89	–	13.3732	0.998602
MR-18-AR-49 (DDH AR-18-210-C2, 812.9 m, Q6b, Basement)
Chip1
GZ1 (growth zone)	8.5	16	-71	<-54	-24	-16.3	132	–	25.3495	0.806886
	12	14	-74	<-54	-23.4	-14.4	134	–	25.3687	0.848643
	5.6	14	-63.1	<-54	-23.5	-9.1	107	–	25.9917	0.849038
	9	14	-77	<-54	-23.3	–	130	–	24.085	0.840626
	12	12	-72	<-54	-23.4	-16.3	126	–	25.127	0.845835
	8	14	-81	<-54	-23.5	-19.3	111	–	24.7617	0.834173
	12.5	12	-74	<-54	-23.7	–	142	–	24.2232	0.811773
Chip2
GZ1 (growth zone)	10	12	-85	<-52	-22.5	–	115	–	23.8016	0.899794
	7	14	-63	<-52	-22.5	-8.7	121.3	–	25.7284	0.912952
	6.5	14	-79	<-52	-22.5	-9.2	125.5	–	25.6747	0.912615
GZ2 (growth zone)	8.5	12	-76	<-50	-17.3	–	101	–	20.3621	0.998602
	10	11	-80	<-52	-22.5	–	105	–	23.8016	0.899794
	16	10	-75	<-57	-22.7	1.5	92.5	–	26.4188	0.90447
	8.3	10	-75	<-50	-22.3	–	90	–	23.7291	0.914832
	12.3	10	-68.3	<-57	-25.6	–	107	–	24.8562	0.683583
MR-18-RK-15 (DDH RK-16-110, 864.1 m, Q6b, Basement)
Chip1
GZ1 (growth zone)	10.5	14	-76.6	<-53	-25.1	–	141	–	24.6928	0.715748
	7	14	-84.5	<-53	-25.1	–	130	–	24.6928	0.715748
	10	14	-77.5	<-53	-25.1	–	135	–	24.6928	0.715748
	21	12	-74.5	<-53	-25.1	-12.1	132	–	26.1702	0.748509
	15.5	10	-79.5	<-53	-25.3	-7.6	137	–	26.6244	0.74544
	7.2	16	-68	–	–	–	132	–	–	–
	15.4	12	-74.5	<-53	-25.1	–	131	–	24.6928	0.715748
	9.4	14	-77.5	<-53	-25.1	-14	140	–	25.9791	0.744566
	17.3	12	-74.5	<-53	-25.1	-15.9	138	–	25.7771	0.740308
Chip2
Intra-HF1 (intracrystal healed fracture)	10	11	-74	<-50	-23.7	-11.9	127	–	25.761	0.833023
	20	11	-75	<-50	-22.8	-10.8	127	–	25.5932	0.89184
	38	11	-69	<-50	-22.8	-11.2	124.1	–	25.5472	0.891472
	9	10	-70	<-50	-22.8	-11.9	132	–	25.4646	0.890816
	7	12	-77	<-50	-23.7	–	132	–	24.2232	0.811773
GZ1 (growth zone)	23	20	–	<-57	-37	–	158	–	28.1884	0.241714
	50	12	–	<-57	-34.8	–	158	–	27.6033	0.291797
	16	16	–	<-56	-37.3	–	154	–	28.2658	0.235818
	18	16	–	<-56	-37	–	154	–	28.1884	0.241714
	31	20	–	<-56	-37	–	174	–	28.1884	0.241714
Chip3
GZ1 (growth zone)	26	11	-73.8	<-53	-22.8	-8.4	130.3	–	25.8521	0.893862
	26	12	-73.8	<-53	-23	-10.2	146	–	25.7247	0.879479
	7.7	14	-77.9	<-53	-23	-8.4	136	–	25.9124	0.881133
	19	12	-76.6	<-53	-22.6	-9	145	–	25.7279	0.90627
MR-17-PLS-05 (DDH PLS-17-523, 287.5 m, Q6b, Basement)
Chip1
GZ1 (growth zone)	10	12	–	–	–	–	118	–	–	–
	55	11	–	–	–	–	118	–	–	–
	24	12	–	–	–	–	123	–	–	–
Chip2
GZ1 (growth zone)	10	12	-79	<-55	-24.8	–	131	–	24.5937	0.73561
	12	16	-75	<-55	-24.6	-10.5	152	–	26.1778	0.780475
	24	12	-75	<-55	-24.6	-10.2	141	–	26.2063	0.78097
	17	11	-80	<-55	-24.8	-10.2	156	–	26.2637	0.769318
	8	14	-80	<-55	-24.6	–	135	–	24.5273	0.749078
GZ1 (growth zone)	14	11	-80	<-50	-25.8	3.4	132	–	26.9985	0.723978
	20	11	-70	<-50	-25	-17.1	149	–	25.6099	0.743411
	10	12	-75	<-50	-23.2	-15	123	–	25.2208	0.860921
	17	12	-71	<-50	-23.7	–	144	–	24.2232	0.811773
	17	14	-75	<-50	-23.2	-14.6	143	–	25.2719	0.861453
	7.3	14	-85	<-50	-23.7	–	127	–	24.2232	0.811773
	20	14	-72.8	<-50	-23.7	–	129	–	24.2232	0.811773
	24	11	-67.8	<-50	-25	3.9	129	–	26.8545	0.767953
	14	16	-85	<-50	-23.5	-12.5	149	–	25.629	0.844841
MR-17-PLS-13 (DDH PLS-14-225, 76.5 m, Q6b, Basement)
Chip3
Intra-HF1 (intracrystal healed fracture)	6	16	-85	<-50	-25.3	–	123	–	24.7584	0.702739
	8	11	–	<-50	-25.4	0	110	–	26.9295	0.745767
	9	11	-88	<-50	-25.3	–	110	–	24.7584	0.702739
	12	10	-80	<-50	-25.3	0	125	–	26.9107	0.751265
Intra-HF2 (intracrystal healed fracture)	21	20	–	<-57	-23.5	–	>220	–	24.1543	0.826131
	9	30	–	<-57	-24	–	>220	–	24.3255	0.790514
	9	25	–	<-57	-25	–	>220	–	24.6598	0.722323
Intra-HF3 (intracrystal healed fracture)	8	14	–	<-54	-25.8	–	94	–	24.921	0.671054
	6	20	–	<-54	-25.8	–	110	–	24.921	0.671054
	6	20	–	<-54	-25.5	–	–	–	24.8236	0.68992
	7	14	–	<-54	-25.2	–	131	–	24.7256	0.70922
	6	20	–	<-54	-25.4	–	122	–	24.791	0.696306
MR-17-PLS-27 (DDH PLS-14-225, 313.6 m, Q6b, Basement)
Chip1
Intra-HF1 (intracrystal healed fracture)	13	10	-80	<-55	-23.8	-13	109	–	25.6707	0.825132
	28	6	-62	<-55	-23.8	-11.4	110	–	25.8465	0.827481
	14	8	-85	<-55	-23.6	-11.6	126	–	25.762	0.839713
	8	10	–	<-55	-23.8	–	125	–	24.2574	0.804649
	8	11	-65	<-55	-23.8	–	136	–	24.2574	0.804649
	16	8	-75	<-55	-24.2	-13.5	135	–	25.7453	0.799415
	11	12	-86	<-55	-23.7	-10.8	145	–	25.879	0.834522
	21	10	-67	<-55	-24.1	-12.1	130	–	25.8656	0.8079
Intra-HF2 (intracrystal healed fracture)	21	4	-78	<-55	-23.7	-15.8	115	–	25.3025	0.82703
	11	8	-80	<-55	-24.1	–	108	–	24.3594	0.783504
	42	6	-74	<-55	-24	-14.1	117	–	25.6115	0.810802
	12	12	-80	<-55	-23.4	–	132	–	24.1197	0.833362
	29	3	-68	<-55	-23.1	-9.6	112	–	25.8201	0.873674
	9	10	-80	<-55	-24.1	-17.2	118	–	25.275	0.798786
	9	9	-70	<-55	-23.4	–	62	–	24.1197	0.833362
MR-17-PLS-30 (DDH PLS-14-205, 120.1 m, Q6b, Basement)
Chip1
IS1 (isolated)	6	11	–	–	-28	-5.6	200	–	27.4038	0.614258
IS2 (isolated)	4	11	–	–	–	–	195	–	–	–
GZ1 (growth zone)	12	11	–	–	-29	–	95	–	25.9256	0.497222
	10	12	–	–	–	–	106	–	–	–
IS3 (isolated)	14	11	–	-54	-26.5	–	204	–	25.1459	0.628751
IS4 (isolated)	10	10	–	–	–	–	168	–	–	–
GZ2 (growth zone)	10	10	–	–	–	–	158	–	–	–
IS5 (isolated)	8	10	–	–	–	–	133	–	–	–
IS6 (isolated)	8	10	–	–	–	–	130	–	–	–
IS7 (isolated)	8	11	–	–	–	–	132	–	–	–
GZ3 (growth zone)	18	12	–	–	–	–	173	–	–	–
MR-17-PLS-39 (DDH PLS-17-550, 210.6 m, Q6b, Basement)
Chip1
Intra-HF1 (intracrystal healed fracture)	6	20	–	–	-23.3	–	–	–	24.085	0.840626
	14	7	-72.5	<-55	-23.3	-15	98	–	25.2575	0.854333
	5	14	-77	<-53	-23.6	-15	140	–	25.3658	0.834783
GZ1 (growth zone)	5	14	–	<-55	-23	–	120	–	23.9799	0.862606
	7	14	–	<-55	–	–	136	–	–	–
	19	11	–	<-55	-22	–	198	–	23.6189	0.93753
	6	25	–	<-55	-25	–	>230	–	24.6598	0.722323
MR-18-CW-02 (DDH CW-01A, 218.2 m, Q6b, Basement)
Chip1
Intra-HF1 (intracrystal healed fracture)	9	12	-69	<-69	-24.3	-13	111	–	25.8322	0.794163
	6	11	-79	<-69	-28.6	–	98	–	25.8031	0.516276
	6	12	-60	<-63	-24.3	–	102	–	24.4269	0.769608
	6.3	12	-69	<-63	-24.3	-15.1	107	–	25.5976	0.790314
Chip2
Intra-HF1 (intracrystal healed fracture)	15	9	-65	<-51	-23	–	97	–	23.9799	0.862606
	18	9	-59	<-51	-23.1	-8.2	95.4	–	25.9618	0.87499
	14	11	-60	<-51	-23.1	–	92.8	–	24.0151	0.855249
	8	12	-61	<-51	–	–	96	–	–	–
	6	12	-77	<-51	–	–	107	–	–	–
GZ (growth zone)	10	–	–	<-55	-41	–	111	–	29.1718	0.178245
MR-18-CW-03 (DDH CW-01A, 233.7 m, Q6b, Basement)
Chip1
Intra-HF1 (intracrystal healed fracture)	16	11	–	–	–	–	118	–	–	–
	16	12	–	–	–	–	140	–	–	–
	15	9	–	–	–	–	107	–	–	–
	15	16	–	–	–	–	192	–	–	–
Chip2
Intra-HF1 (intracrystal healed fracture)	7	16	-83	>-50	-23	-13.5	208	–	25.3385	0.875984
	7.8	14	-72	>-50	-22.5	-13.5	172	–	25.1571	0.90929
	7.6	14	-72	>-50	-22.6	-10.7	168	–	25.5386	0.90498
Intra-HF2 (intracrystal healed fracture)	6.2	16	–	>-50	-23	-11	244	–	25.6359	0.878686
	6.6	16	–	>-50	-23.3	–	>250	–	24.085	0.840626
Chip3
Intra-HF1 (intracrystal healed fracture)	15	14	-70	>-45	-23.2	0	129	–	26.5154	0.873692
	19	12	-65	>-45	-22.6	–	130	–	23.8376	0.892307
	19	16	-67	>-45	-23.1	-8.6	132	–	25.9223	0.874628
	35	11	-65	>-45	-23.1	-7.3	131	–	26.0473	0.875779
	28	11	-68.1	>-45	-23	-3.5	130	–	26.3312	0.884726
MR-18-CW-04 (DDH CW-01A, 239.7 m, Q6b, Basement)
Chip1
Intra-HF1 (intracrystal healed fracture)	21	12	-70	<-50	-24	-6.3	141	–	26.3826	0.82176
	28	13	-70	<-50	-24	-5	135	–	26.4828	0.823124
	23	13	-70	<-50	-24	–	139	–	24.3255	0.790514
	16	12	-70	<-55	-23.8	-4.4	132	–	26.4746	0.835552
	15	9	-67	<-50	-24	–	–	–	24.3255	0.790514
Intra-HF2 (intracrystal healed fracture)	18	11	-69	<-50	-23.8	-2.5	117	–	26.5999	0.837109
	23	8	-71.5	<-50	-23.8	2.2	117	–	26.6351	0.837542
	18	9	-69	<-50	-23.8	-0.7	117	–	26.6351	0.837542
	23	9	-69	<-50	-23.8	-1.7	116	–	26.6351	0.837542
	13	9	-69	<-50	-23.8	-1.5	115	–	26.6351	0.837542
Intra-HF3 (intracrystal healed fracture)	16	9	-80	<-50	-23.7	–	133	–	24.2232	0.811773
	9	11	-78	<-50	-23.7	–	130	–	24.2232	0.811773
	12	10	-70	<-50	-23.7	-11.5	139	–	25.8045	0.833576
	14	11	–	<-50	-23.7	-3.2	191	–	26.531	0.842507
Intra-HF4 (intracrystal healed fracture)	13	10	–	<-50	-24.1	-3.2	185	–	26.6314	0.818945
	12	8	-80	<-50	-24.1	–	191	–	24.3594	0.783504
*Sz – size; V % – vapor percentage; Tf – freezing temperature; Tfm – first melting temperature; Tm-ice – ice-melting temperature; Tm-HH – hydrohalite-melting temperature; Thv – homogenization (vapor to liquid) temperature; Tm-H – halite dissolution temperature; Sal. – salinity; XNaCl – NaCl/(NaCl+CaCl2) weight ratio; “–” – data unavailable. Inclusions highlighted by grey color are excluded from t…
